# Supplementary material
Source: PubMed Central journal article supplement (PMC470737)

## Supporting Information

### MPA questionnaire

BIRDLIFE INTERNATIONAL, WWF-US AND PIPPA GRAVESTOCK AT CRANFIELD UNIVERSITY (UK) IN CONJUNCTION WITH CALLUM ROBERTS AT YORK UNIVERSITY (UK) AND ANDREW BALMFORD AT CAMBRIDGE UNIVERSITY (UK), ARE GATHERING INFORMATION AS PART OF A STUDY ON THE COSTS OF MANAGING MARINE PROTECTED AREAS

Marine resources are increasingly threatened by human activities and there is urgent need for effective marine protected areas around the world. At present there is no good information available on how much it will cost to provide effective protected area management for the world's seas. We aim to make such an estimate and seek your help. We would be very grateful if you would help us in this project by completing this questionnaire and emailing us your reply.

Please reply, preferably by email, by **10 March 2002** to:

Andrew Balmford  
Conservation Biology Group, Dept of Zoology  
University of Cambridge  
Cambridge CB2 3EJ  
UK

[a.balmford@zoo.cam.ac.uk](mailto:a.balmford@zoo.cam.ac.uk)

We are interested in obtaining information for individual protected areas. If you have information on more than one, please complete a questionnaire for EACH protected area. In all cases, please provide the most up-to-date information and state the financial year to which it applies. We would appreciate as much detail as you can give us. Please type your answers directly into this Word document in the blue sections.

If the area concerned is both a marine and land protected area, please limit your answers to the marine component where possible.

**THANK YOU FOR YOUR HELP**

## 1. RESPONDENT DETAILS

Name

Position

Institution

Address

Tel

Fax

E-mail

Web-site address of protected area

## 2. MARINE PROTECTED AREA DETAILS

Name of protected area

Main habitats / key species  
protected

Legal designation (if any)

Total area protected (include units)

Zonation (if appropriate) including total  
area protected from all fishing

Estimated number of annual visitors

Number of staff

→ field employees (including rangers)

→ administrative employees

→ other employees (please specify)

Purposes of protected area:

Reply YES to purposes which apply to  
your protected area and list them  
according to management priority ie  
1 = most important 5 = least important

Habitat protection

|                                                                                                                                             |  |
|---------------------------------------------------------------------------------------------------------------------------------------------|--|
| Species protection                                                                                                                          |  |
| Archaeological / historical protection                                                                                                      |  |
| Protection of unique or unusual geological features                                                                                         |  |
| Research and monitoring                                                                                                                     |  |
| Fishing:                                                                                                                                    |  |
| → commercial                                                                                                                                |  |
| → recreational                                                                                                                              |  |
| Other recreational uses (specify)                                                                                                           |  |
| Other commercial uses (specify)                                                                                                             |  |
| Subsistence uses                                                                                                                            |  |
| Other (please state)                                                                                                                        |  |
| Is the area designed to protect habitats and species to benefit commercial fisheries outside of the protected area eg. as a refuge nursery? |  |

**3. INCOME**

|                                                                                                                        |  |
|------------------------------------------------------------------------------------------------------------------------|--|
| <b>TOTAL INCOME FOR THE LATEST FINANCIAL YEAR =</b>                                                                    |  |
| Financial year ending (month and year)                                                                                 |  |
| Reporting currency                                                                                                     |  |
| Sources of income (approximate amounts):                                                                               |  |
| → state or national government funding                                                                                 |  |
| → carried over from prior years                                                                                        |  |
| → domestically generated donations                                                                                     |  |
| → foreign sources of funding                                                                                           |  |
| → visitor fees<br>(if visitor fees are charged please give details of the amounts charged to each category of visitor) |  |
| → any other sources (please specify)                                                                                   |  |
| Any comments on funding sources                                                                                        |  |

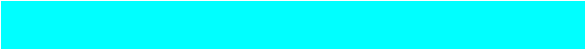

**4. SPENDING**

**TOTAL SPENDING FOR THE LATEST FINANCIAL YEAR =**

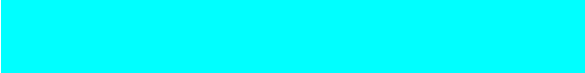

Financial year ending (month and year)

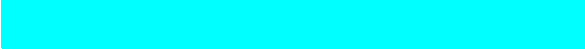

Reporting currency

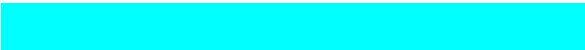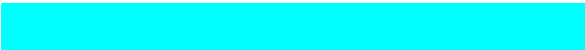

Approximate breakdown of spending:



→ wages and salaries

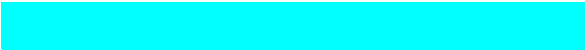

→ regular operational costs eg. fuel, maintenance, rental of buildings, spare parts

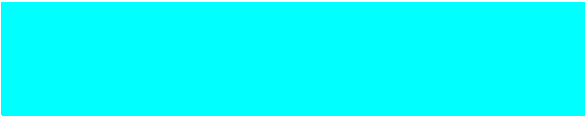

→ replacement of worn-out equipment eg. boats, vehicles

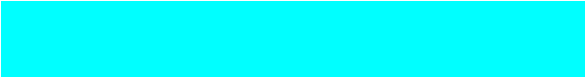

→ investments in new facilities



Over the last 5 years what has been the total capital spent on new facilities?

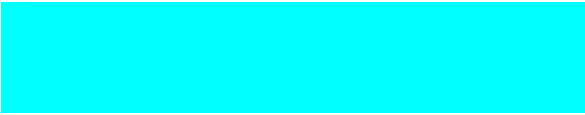

What types of activity is money being spent on? For example protection, research, visitor facilities

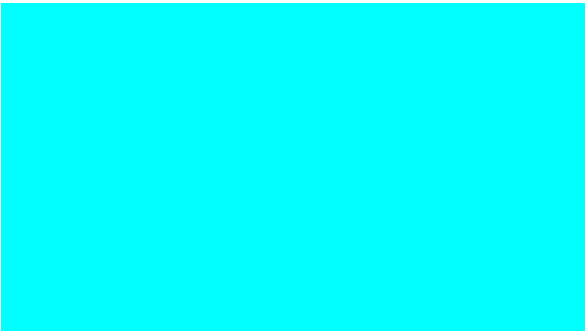

Please describe giving a breakdown of spending in either currency or as a % of total expenditure

If there is a difference between income and the amount of money spent, please explain



## 5. FUTURE FUNDING REQUIREMENTS

This question refers to a MINIMUM standard of management

Is there a shortfall between actual spending and the amount you estimate would be required to bring management of the protected area up to the minimum level necessary to achieve the aims or objectives of the area?

If so, by how much?

This question refers to an IDEAL standard of management

How much more money would be needed to bring management up to an ideal standard of protection and management?

How would any increase in funding be spent?

## 6. OTHER RESEARCH

Has any other research been done on the protected area? This might include work on, for example, the biological or economic values of the protected area

Please give details (e.g. author, title, publication date, source). If possible please supply copies of the reports

All the information given in response to this questionnaire will be treated in the STRICTEST CONFIDENCE. We will produce an aggregated summary of the findings available for general distribution and will send you a copy when the report is complete.

Please send any supplementary information to:

Andrew Balmford  
Conservation Biology Group, Dept of Zoology  
University of Cambridge  
Cambridge CB2 3EJ  
UK

Email: [a.balmford@zoo.cam.ac.uk](mailto:a.balmford@zoo.cam.ac.uk)

If there is any additional information you think will be of benefit to this study,  
please add relevant details below:

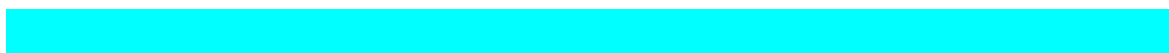

Supplement: pnas_101_26_9694__1.pdf [file pnas_101_26_9694__1.pdf]
